# Supplementary material
Source: PubMed Central journal article supplement (PMC3631599)

**Electronic Supplemental Information for:**

**Chemical Insight Into The Origin of Red and Blue**

**Photoluminescence Arising From Freestanding Silicon**

**Nanocrystals.**

*Mita Dasog,<sup>†</sup> Zhenyu Yang,<sup>†</sup> Sarah Regli,<sup>†</sup> Tonya M. Atkins,<sup>‡</sup> Angelique Faramus,<sup>§</sup> Mani P. Singh,<sup>‡</sup> Elayaraja Muthuswamy,<sup>‡</sup> Susan M. Kauzlarich,<sup>‡</sup> Richard D. Tilley,<sup>§</sup> Jonathan G. C. Veinot<sup>\*,†,¶</sup>*

<sup>†</sup>Department of Chemistry, University of Alberta, Edmonton, Alberta T6G 2G2, Canada; <sup>¶</sup>NRC-National Institute for Nanotechnology, Edmonton, Alberta, T6G 2M9, Canada; <sup>‡</sup> Department of Chemistry, University of California, One Shields Avenue, Davis, California 95616, United States; <sup>§</sup>School of Chemical and Physical Sciences and the MacDiarmid Institute for Advanced Materials and Nanotechnology, Victoria University of Wellington, Wellington 6012, New Zealand

**Figure S1.** A summary of the characterization of the oxide embedded and hydride-terminated (H-Si NCs) silicon nanocrystals obtained from thermal treatment of HSQ. **(A)** X-ray powder diffraction pattern of Si NCs embedded in silica. The broad reflection at *ca.* 20° arises from the amorphous silica-like matrix. **(B)** FT-IR spectrum of H-Si NCs. Absorptions at *ca.* 1050 cm<sup>-1</sup> is attributed to Si–O–Si stretching and *ca.* 2100 and *ca.* 900 cm<sup>-1</sup> are attributed to Si–H<sub>x</sub> stretching and bending vibrations, respectively. **(C)** PL spectrum of H-Si NCs. **(D)** Excited state life time of H-Si NCs upon exciting with 349 nm wavelength laser. **(E)** Bright field TEM micrograph of H-Si NCs with a diameter *ca.* 3.5 ± 0.4 nm. The image was acquired at 200kV accelerating voltage.

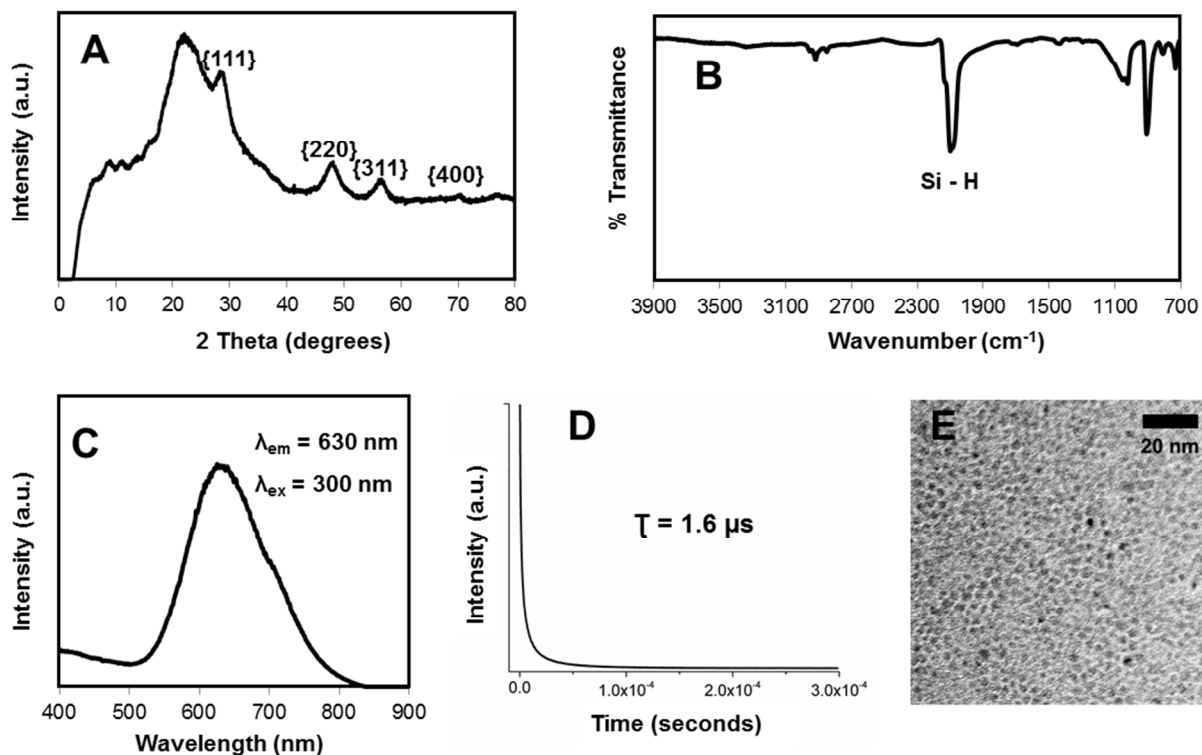

**Figure S2.** X-ray photoelectron spectra (XPS) of dodecyl surface functionalized Si NCs (Si NC-  
A). (A) Survey spectrum showing emissions arising from Si, C and O. (B) High resolution XP  
analysis of the silicon 2p spectral region. For clarity, only Si 2p<sub>3/2</sub> emissions are shown.

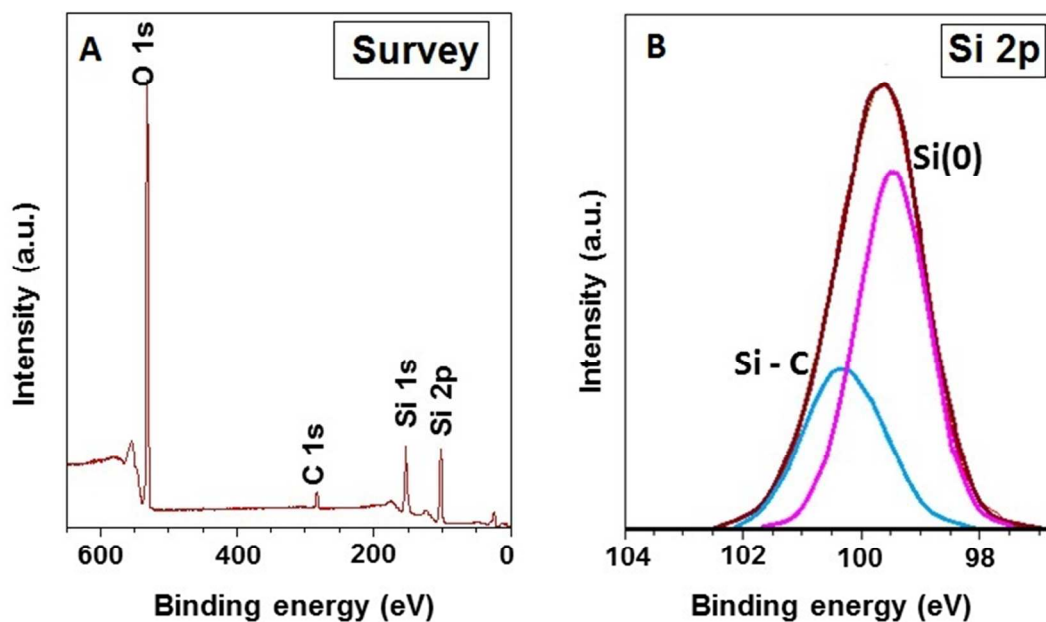

**Figure S3.** XPS spectra of the nitrogen 1s and silicon 2p spectral regions for H-Si NCs exposed to a variety of nitrogen sources: (A, B) TOAB functionalized Si NCs and (C, D) NH<sub>4</sub>Br functionalized Si NCs. For clarity only Si 2p<sub>2/3</sub> signals are shown.

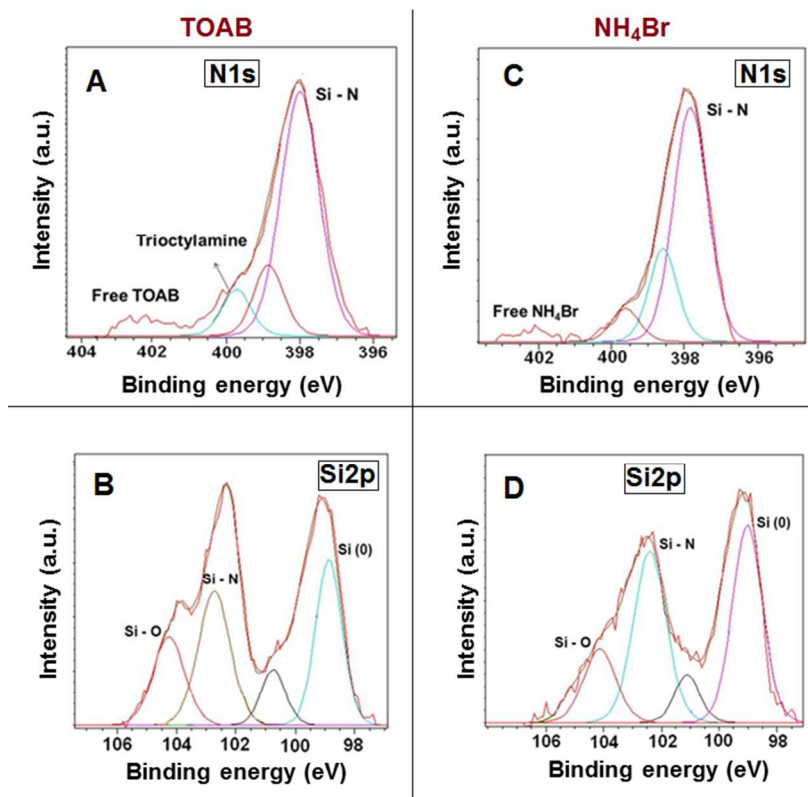

**Figure S4.**  $^1\text{H}$  NMR of the byproducts obtained by reacting H-SiNCs with TOAB confirming the formation of trioctylamine and octane.

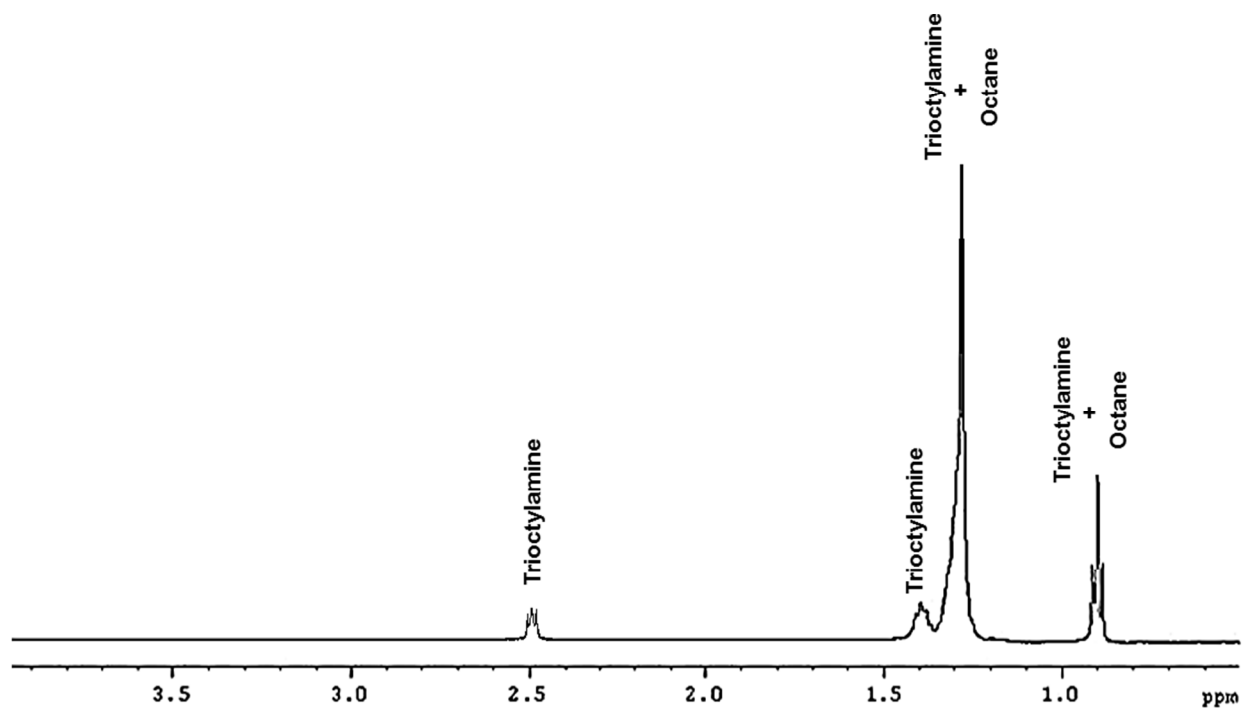

**Figure S5.** Photoluminescence decay of H-Si NCs reacted with (A) TOAB and (B)  $\text{NH}_4\text{Br}$ .

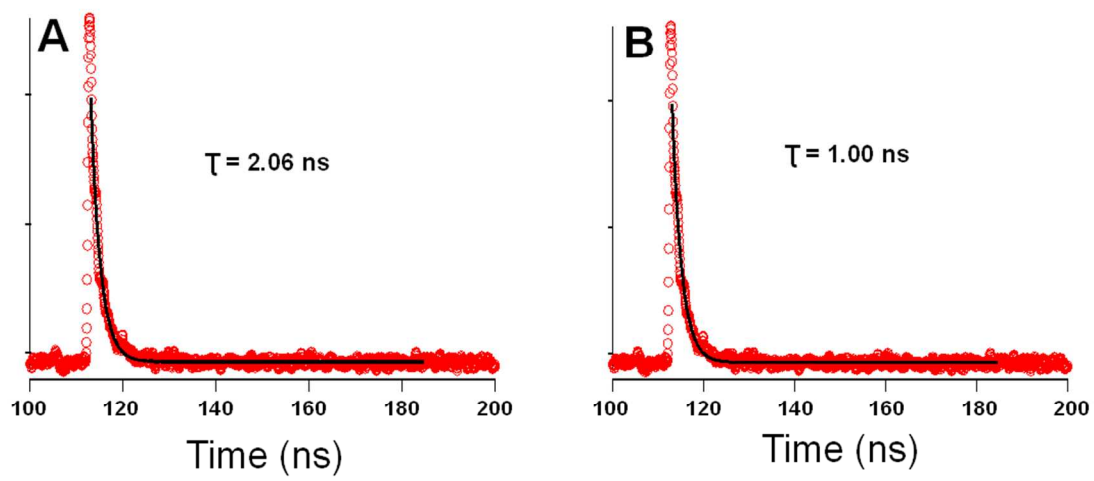

**Figure S6.** PL intensity at 420 nm vs. nitrogen concentration for H-Si NCs reacted with (A) TOAB and (B)  $\text{NH}_4\text{Br}$ .

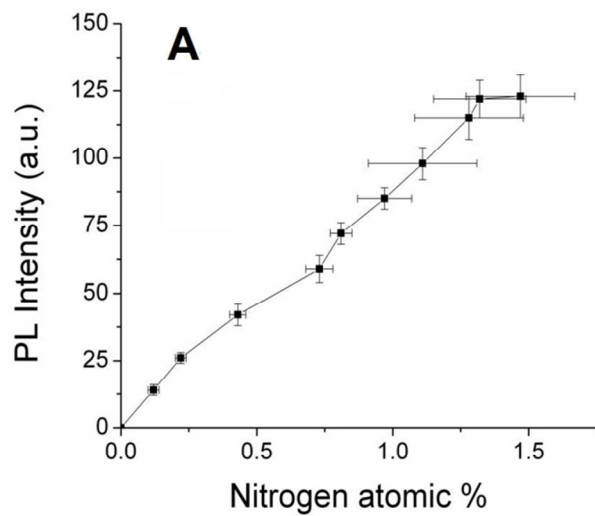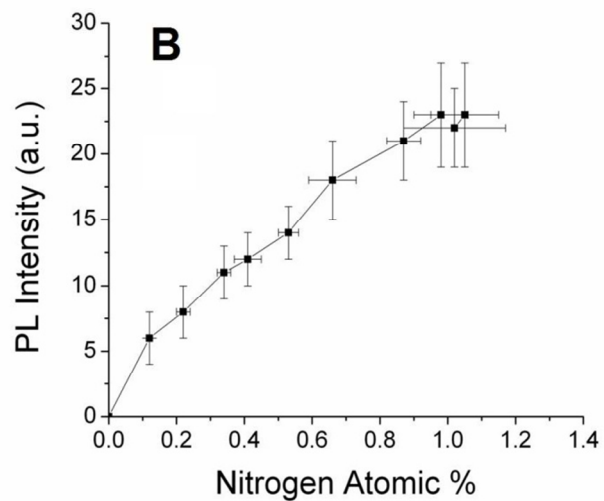

Supplement: NIHMS449501-supplement-1_si_001.pdf [file NIHMS449501-supplement-1_si_001.pdf]
